# Supplementary material for: Flat-top TIRF illumination boosts DNA-PAINT imaging and quantification
Source: PubMed Central journal article supplement (PMC6426843; doi:10.1038/s41467-019-09064-6), 2019-03-20
Supplement: 41467_2019_9064_MOESM1_ESM.pdf [file 41467_2019_9064_MOESM1_ESM.pdf]

## Supplementary Information

### Flat-top TIRF illumination boosts DNA-PAINT imaging and quantification

Stehr, Stein et al.

|                                |                                                                                          |
|--------------------------------|------------------------------------------------------------------------------------------|
| <b>Supplementary Figure 1</b>  | Schematic of custom-built super-resolution microscopy setup                              |
| <b>Supplementary Figure 2</b>  | Spot detection and net gradient                                                          |
| <b>Supplementary Figure 3</b>  | Bright time distributions for 8-nt vs. 9-nt docking site length                          |
| <b>Supplementary Figure 4</b>  | Averaged 20-nm-grid image for 8-nt vs. 9-nt docking sites length for flat-top excitation |
| <b>Supplementary Figure 5</b>  | Individual origami images for averaging                                                  |
| <b>Supplementary Figure 6</b>  | Segment-wise photon count distribution Gauss vs. Flat-top                                |
| <b>Supplementary Figure 7</b>  | Uniform spot-detection efficiency for cellular DNA-PAINT imaging                         |
| <b>Supplementary Figure 8</b>  | Mislocalization removal by multi-emitter filtering                                       |
| <b>Supplementary Figure 9</b>  | Mislocalization removal by multi-emitter filtering for Gaussian illumination             |
| <b>Supplementary Figure 10</b> | DNA origami grid designs                                                                 |
| <b>Supplementary Figure 11</b> | Laser power comparison Gauss vs. Flat-Top                                                |
| <b>Supplementary Figure 12</b> | Filtering by temporal distribution of localizations                                      |
| <b>Supplementary Table 1</b>   | List of core staples                                                                     |
| <b>Supplementary Table 2</b>   | List of biotinylated staples                                                             |
| <b>Supplementary Table 3</b>   | Imaging parameters                                                                       |
| <b>Supplementary Table 4</b>   | DNA-PAINT imager sequences                                                               |

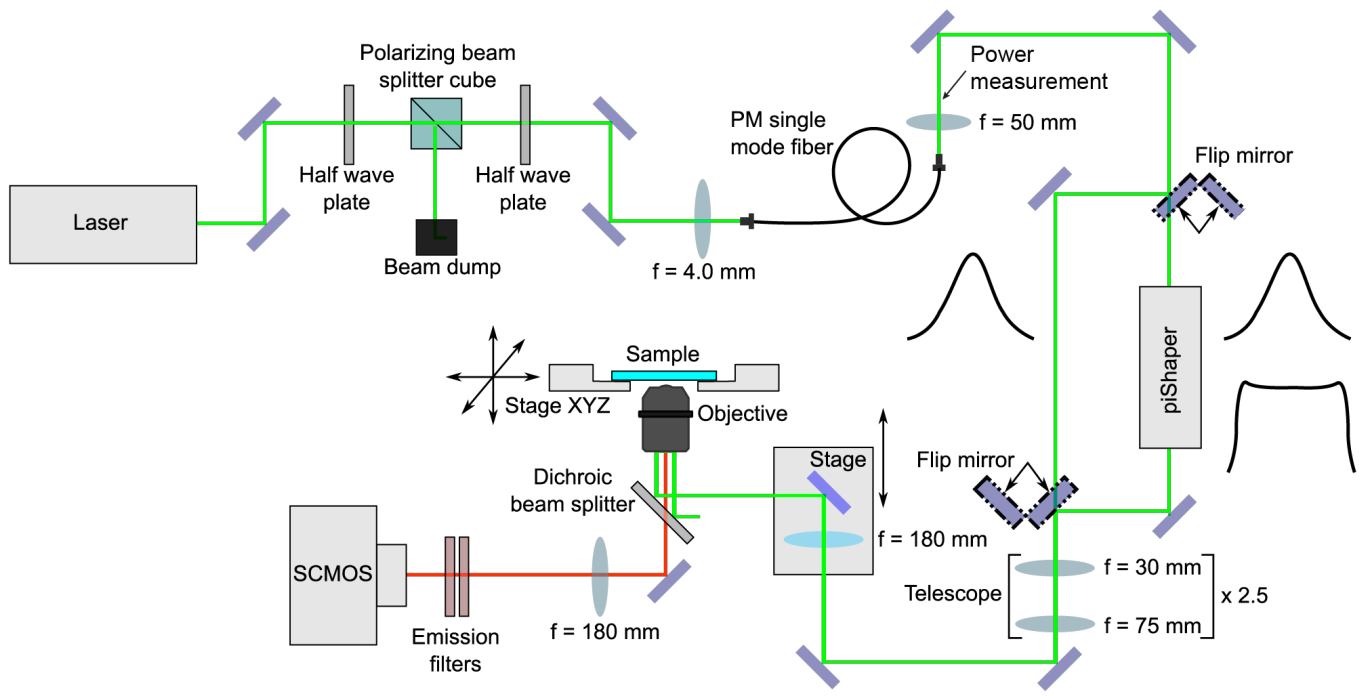

**Supplementary Figure 1 | Schematic of custom-built super-resolution microscopy setup.** Blue rectangles indicate dielectric mirrors, ellipses indicate lenses.

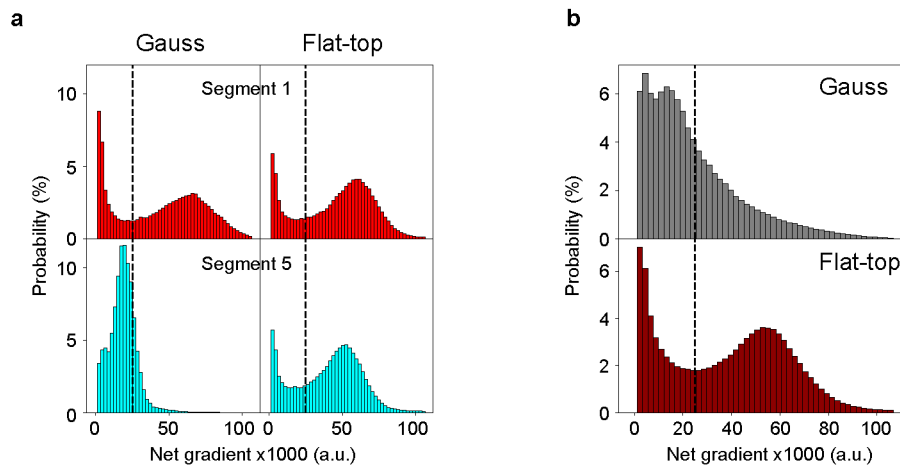

**Supplementary Figure 2 | Spot detection and net gradient.** **a** Net gradient histograms comparing segments 1 and 5 of 20-nm-grid images acquired with Gaussian and flat-top illumination. For DNA-PAINT (but also for SMLM in general) a localization algorithm implemented in Picasso<sup>1</sup> distinguishes between bright blinking events and background noise by computing the net gradient between adjacent pixels in the raw images. A threshold value (dashed line) is chosen manually such that in the center (segment 1) only blinking events and no background is recognized. Due to the inhomogeneous illumination of a Gaussian profile the net gradient in segment 5 does not reach this threshold anymore and blinking events are not recognized. DNA-PAINT data acquired under flat-top illumination show a homogeneous net gradient comparing segments 1 and 5. **b** Net gradient sum histograms for the two images from **a**

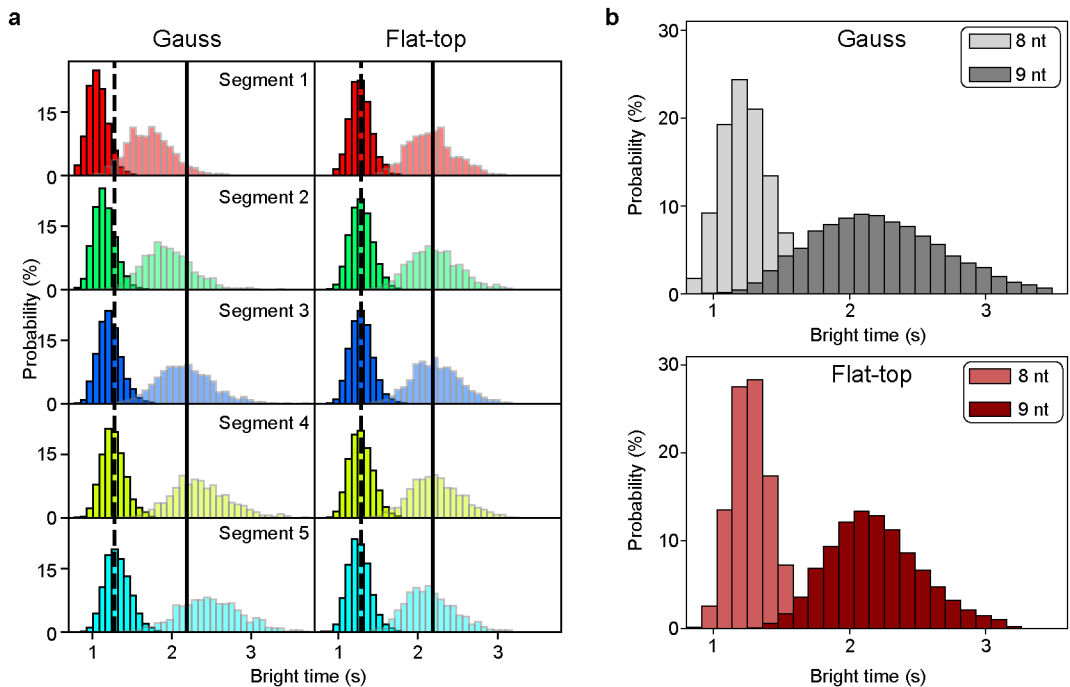

**Supplementary Figure 3 | Bright time distributions for 8-nt vs. 9-nt docking site length.** **a** Segmented bright time histograms for 20-nm-grids with 8-nt docking sites (opaque) and 9-nt docking site length (transparent) for Gauss and flat-top illumination. Mean bright times (over all segments) for flat-top illumination are indicated by dashed lines for 8-nt and solid lines for 9-nt. **b** Total bright time distributions for 8-nt vs 9-nt

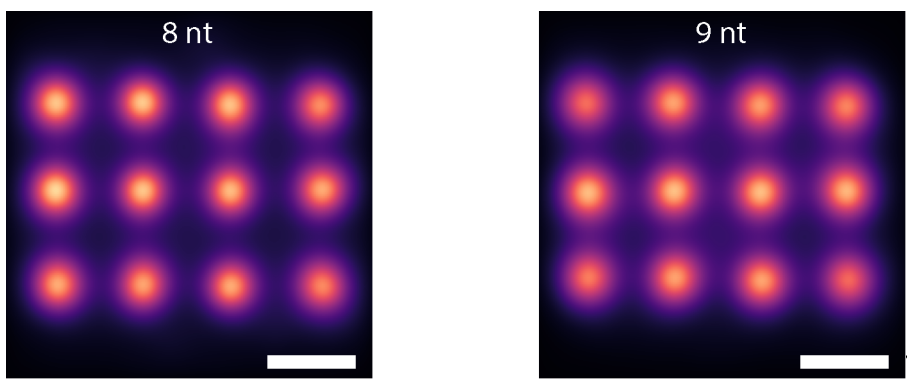

**Supplementary Figure 4 | Averaged 20-nm-grid image for 8-nt vs. 9-nt docking sites for flat-top excitation.** Over 8.000 DNA origami over the whole FOV for the flat-top data sets (8nt and 9nt docking strands) in Figure 2h and Supplementary Figure 5 were averaged and confirms that 20-nm resolution is conserved while origamis can be identified according to their bright times. Scale bars: 20 nm.

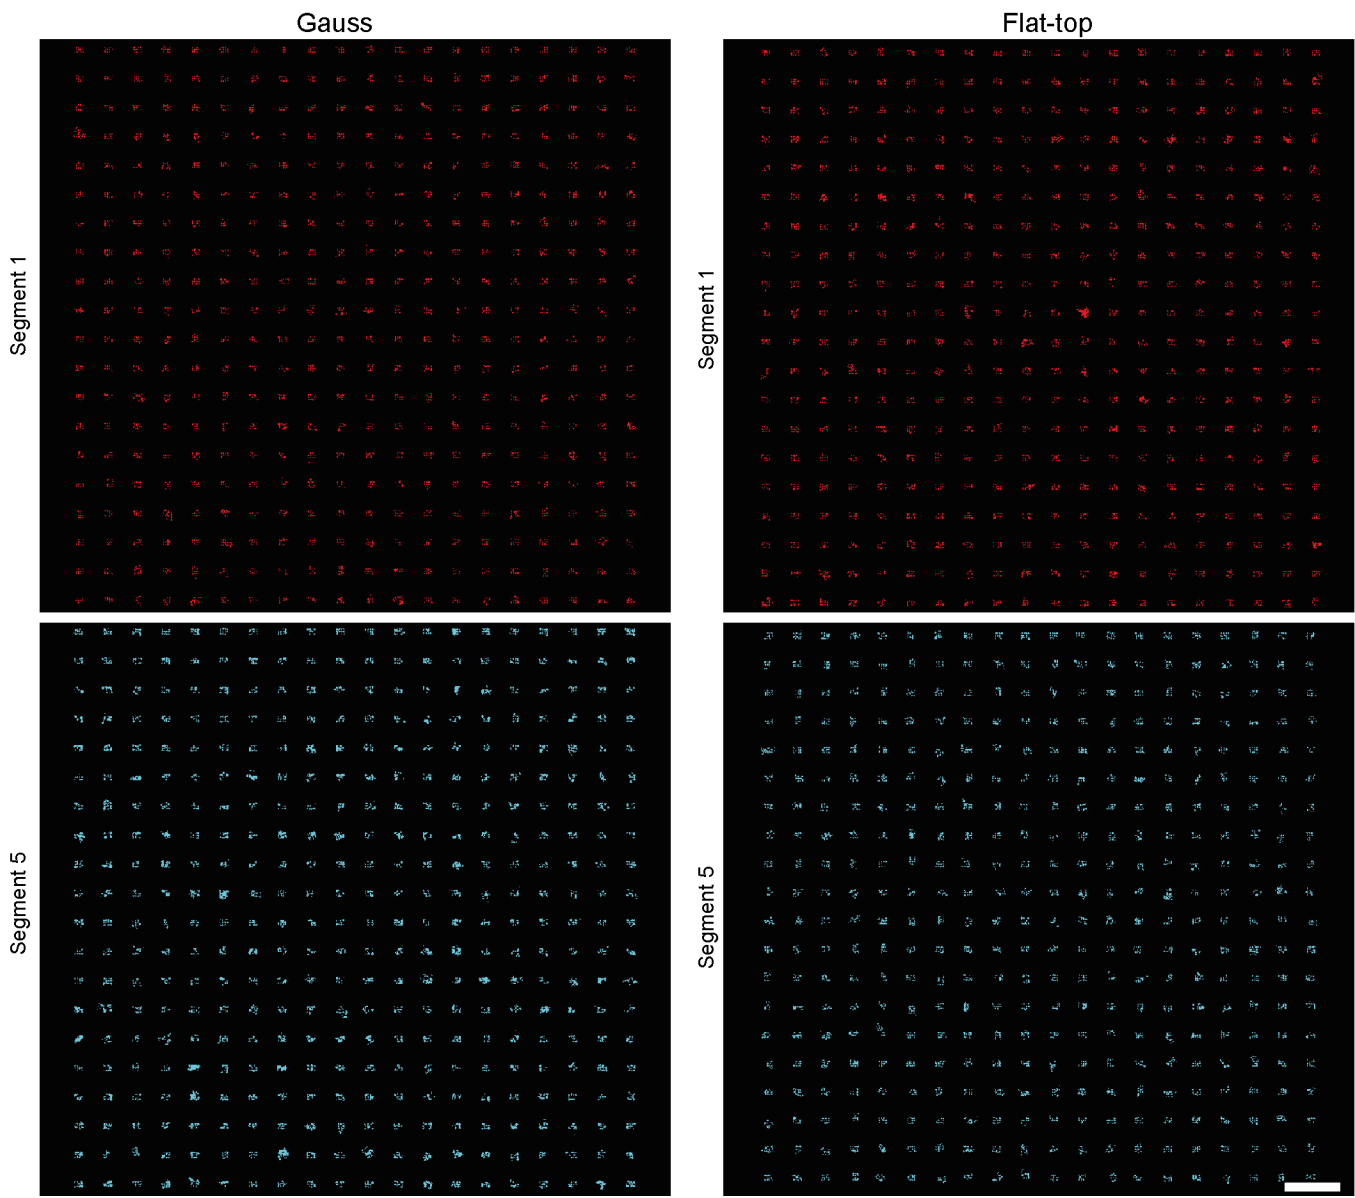

**Supplementary Figure 5 | Individual origami images for averaging.** Image showing 400 DNA origami structures extracted from segment 1 (red) and segment 5 (cyan) for DNA-PAINT images acquired with Gaussian (left) and flat-top illumination (right). In total more than 700 structures were used for averaging in Figure 3a. Scale bar: 500 nm.

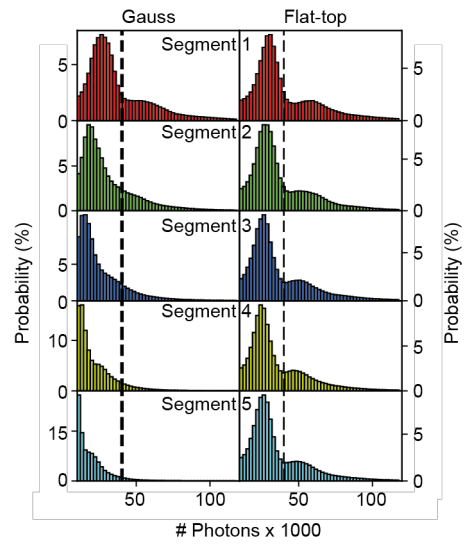

Supplementary Figure 6 | Segment-wise photon count distribution Gauss vs Flat-top.

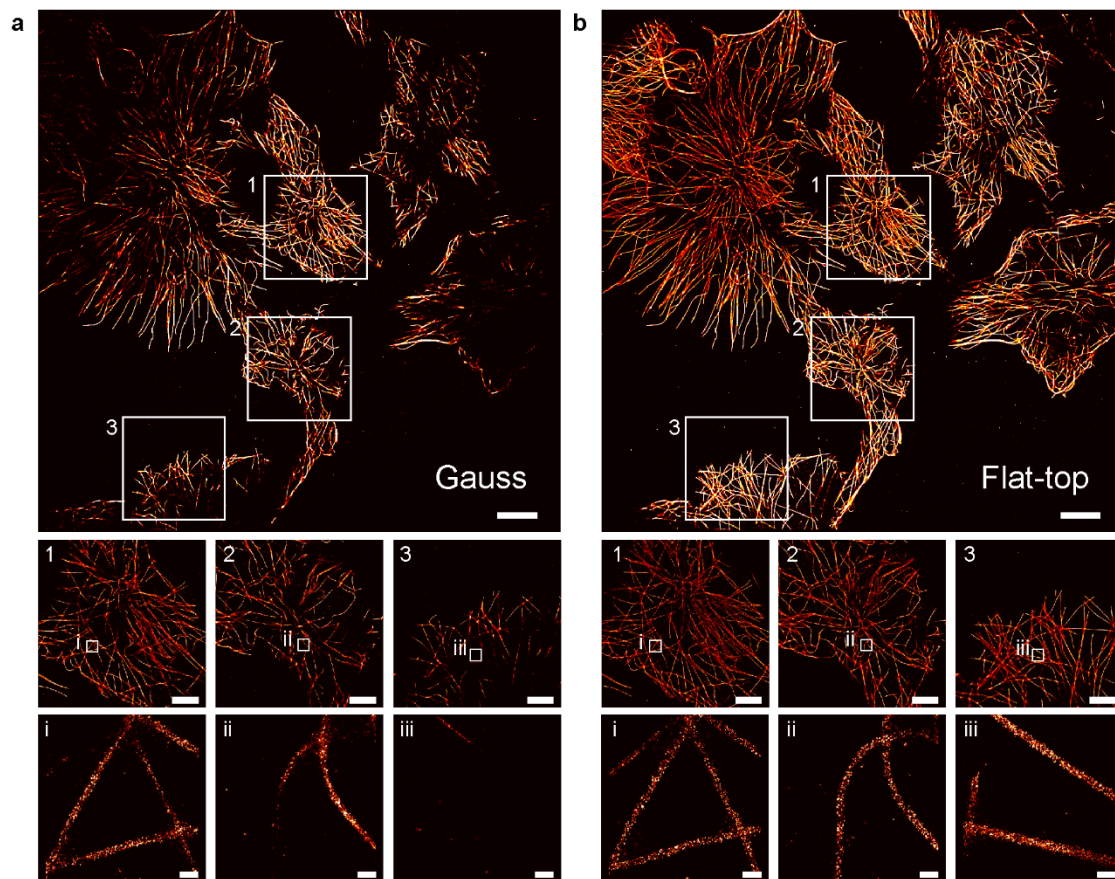

**Supplementary Figure 7 | Uniform spot-detection efficiency for cellular DNA-PAINT imaging.** **a** (top) Full camera chip ( $130 \times 130 \mu\text{m}^2$ ) DNA-PAINT image of the microtubule network in fixed COS-7 cells acquired using Gaussian illumination. (middle row) Three boxes highlighting the image quality in the center, intermediate and border region of the camera chip. (bottom row) Second-level zooms i)-iii) highlighting the inhomogeneous localization density over the whole image **b** Image of the same field of view as in **a** acquired with flat-top illumination profile for uniform localization density and image quality. Scale bars,  $10 \mu\text{m}$  top images,  $4 \mu\text{m}$  in middle row and  $200 \text{ nm}$  in bottom row.

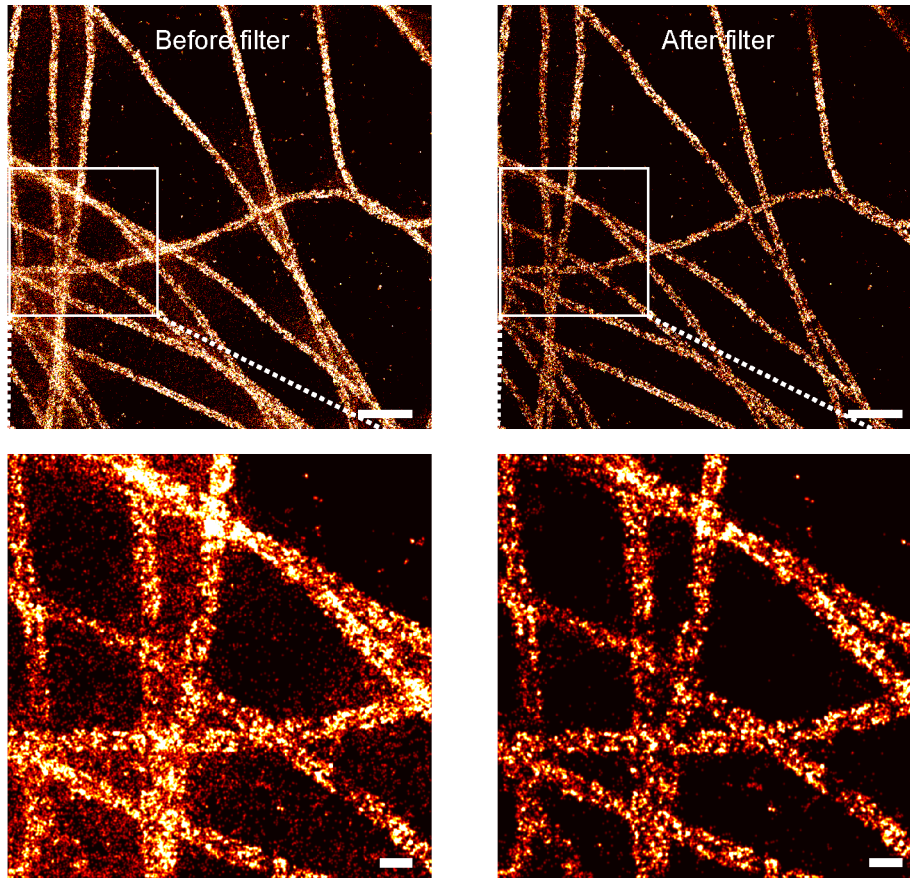

**Supplementary Figure 8 | Mislocalization removal by multi-emitter filtering.** Magnified region of cell image acquired under flat-top illumination (as in Figure 4b). Scale bars, top 500 nm, bottom 100 nm.

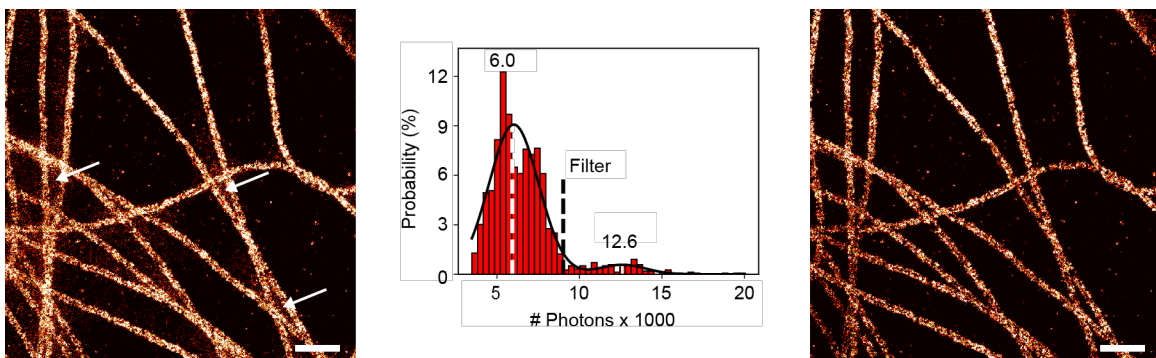

**Supplementary Figure 9 | Mislocalization removal by multi-emitter filtering for Gaussian illumination.** Magnified region of cell image acquired under Gaussian illumination (as in Figure 4b). Scale bars 500 nm.

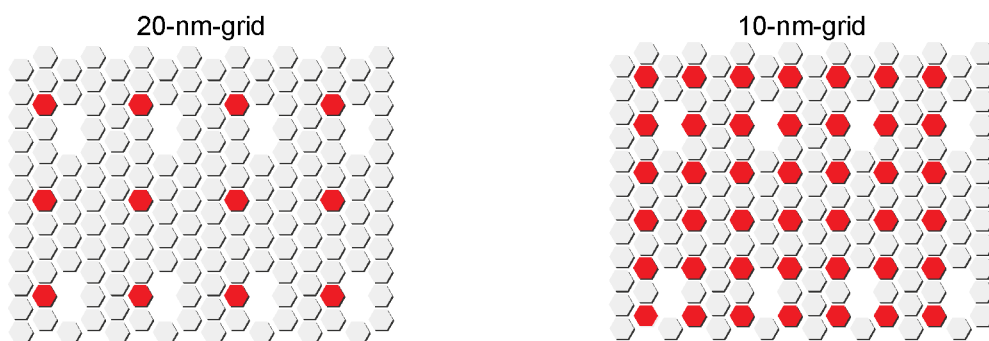

**Supplementary Figure 10 | DNA origami grid designs.** Picasso Design<sup>1</sup> schematic for 20- and 10-nm-grids. Red hexagons indicate extended staple strands for DNA-PAINT imaging. Missing hexagons indicate the position of extended staple strands on the opposite side, which are functionalized with biotin for surface immobilization.

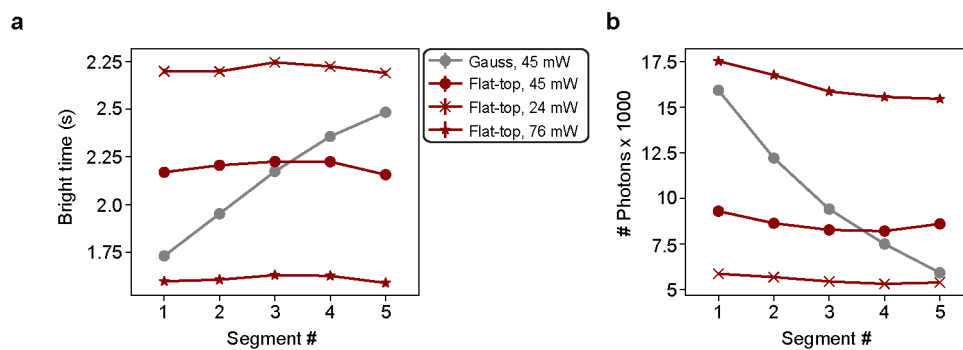

**Supplementary Figure 11 | Laser power comparison Gauss vs. Flat-Top.** **a** Mean bright time per segment for 9-nt 20-nm-grids **b** Mean number of detected photons per localization with respect to each segment for same data sets as in **a**.



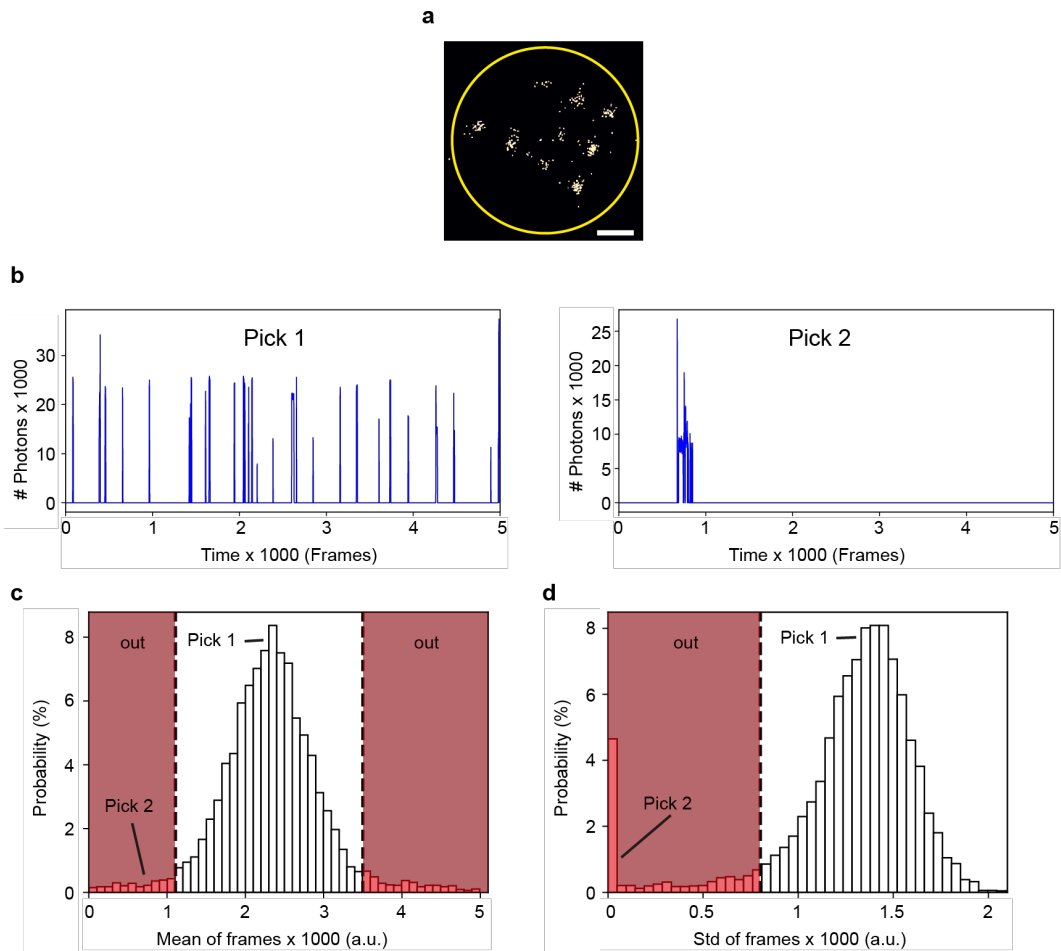

**Supplementary Figure 12 | Filtering by temporal distribution of localizations.** **a** Exemplary auto-selected ROI (yellow circle) of a 20-nm grid in the rendered super-resolution image **b** Typical intensity traces from picks showing repetitive (left) and non-repetitive blinking behavior (right) **c** Exemplary distribution of the mean (localization) frame of all auto-selected picks and **d** the respective distribution for the standard deviation. Values corresponding to picks shown in **b** are indicated. Red areas in both **c** and **d** are discarded before further analysis.

**Supplementary Table 1 | List of core staples**

| Position | Name              | Sequence                                 |
|----------|-------------------|------------------------------------------|
| A1       | 21[32]23[31]BLK   | TTTTCACTCAAAGGGCGAAAAACCATCACC           |
| B1       | 23[32]22[48]BLK   | CAAATCAAGTTTTTTGGGGTTCGAAACGTGGA         |
| C1       | 21[56]23[63]BLK   | AGCTGATTGCCCTTCAGAGTCCACTATTAAGGGTGCCGT  |
| D1       | 23[64]22[80]BLK   | AAAGCACTAAATCGGAACCCTAATCCAGTT           |
| E1       | 21[96]23[95]BLK   | AGCAAGCGTAGGGTTGAGTGTTGTAGGGAGCC         |
| F1       | 23[96]22[112]BLK  | CCCATTAGAGCTTGACGGGGAAAAAGAATA           |
| G1       | 21[120]23[127]BLK | CCCAGCAGGCGAAAAATCCCTTATAAATCAAGCCGGCG   |
| H1       | 21[160]22[144]BLK | TCAATATCGAACCTCAAATATCAATTCCGAAA         |
| I1       | 23[128]23[159]BLK | AACGTGGCGAGAAAGGAAGGGAAACAGTAA           |
| J1       | 23[160]22[176]BLK | TAAAAGGGACATTCTGGCCAACAAAGCATC           |
| K1       | 21[184]23[191]BLK | TCAACAGTTGAAAGGAGCAAATGAAAAATCTAGAGATAGA |
| L1       | 23[192]22[208]BLK | ACCCTTCTGACCTGAAAGCGTAAGACGCTGAG         |
| M1       | 21[224]23[223]BLK | CTTTAGGGCCTGCAACAGTGCCAATACGTG           |
| N1       | 23[224]22[240]BLK | GCACAGACAATATTTTTGAATGGGGTCAGTA          |
| O1       | 21[248]23[255]BLK | AGATTAGAGCCGTCAAAAACAGAGGTGAGGCCTATTAGT  |
| P1       | 23[256]22[272]BLK | CTTTAATGCGCGAACTGATAGCCCCACCAG           |
| A2       | 19[32]21[31]BLK   | GTGCACTTCGGCCAACGCGCGGGGTTTTTC           |
| B2       | 22[47]20[48]BLK   | CTCCAACGCAGTGAGACGGGCAACCAGCTGCA         |
| D2       | 22[79]20[80]BLK   | TGGAACAACCGCCTGGCCCTGAGGCCCGCT           |
| E2       | 19[96]21[95]BLK   | CTGTGTGATTGCGTTGCGCTCACTAGAGTTGC         |
| F2       | 22[111]20[112]BLK | GCCCGAGAGTCCACGCTGGTTTGCAGCTAACT         |
| H2       | 19[160]20[144]BLK | GCAATTCACATATTCCTGATTATCAAAGTGTA         |
| I2       | 22[143]21[159]BLK | TCGGCAAATCCTGTTTGATGGTGGACCCTCAA         |
| J2       | 22[175]20[176]BLK | ACCTTGCTTGGTCAAGTTGGCAAAGAGCGGA          |
| L2       | 22[207]20[208]BLK | AGCCAGCAATTGAGGAAGTTATCATCATTTT          |
| M2       | 19[224]21[223]BLK | CTACCATAGTTTGAGTAACATTTAAATAT            |
| N2       | 22[239]20[240]BLK | TTAACACCAGCACTAACAATAATCGTTATTA          |
| P2       | 22[271]20[272]BLK | CAGAAGATTAGATAATACATTTGTCGACAA           |
| A3       | 17[32]19[31]BLK   | TGCATCTTTCCAGTCCAGACGGCCTGCAG            |
| B3       | 20[47]18[48]BLK   | TTAATGAACTAGAGGATCCCCGGGGGGTAACG         |
| D3       | 20[79]18[80]BLK   | TTCCAGTCGTAATCATGGTCATAAAAGGGG           |
| E3       | 17[96]19[95]BLK   | GCTTTCCGATTACGCCAGCTGGCGGCTGTTTC         |
| F3       | 20[111]18[112]BLK | CACATTAATTTGTTATCCGCTCATGCGGGCC          |
| H3       | 17[160]18[144]BLK | AGAAAACAAAGAAGATGATGAAACAGGCTGCG         |
| I3       | 20[143]19[159]BLK | AAGCCTGGTACGAGCCGGAAGCATAGATGATG         |
| J3       | 20[175]18[176]BLK | ATTATCATTCAATATAATCCTGACAATTAC           |

|    |                   |                                                    |
|----|-------------------|----------------------------------------------------|
| L3 | 20[207]18[208]BLK | GCGGAACATCTGAATAATGGAAGGTACAAAAT                   |
| M3 | 17[224]19[223]BLK | CATAAATCTTTGAATACCAAGTGTAGAAC                      |
| N3 | 20[239]18[240]BLK | ATTTTAAAATCAAATTATTTGCACGGATTCTG                   |
| P3 | 20[271]18[272]BLK | CTCGTATTAGAAATTGCGTAGATACAGTAC                     |
| A4 | 15[32]17[31]BLK   | TAATCAGCGGATTGACCGTAATCGTAACCG                     |
| B4 | 18[47]16[48]BLK   | CCAGGGTTGCCAGTTTGAGGGGACCCGTGGGA                   |
| C4 | 15[64]18[64]BLK   | GTATAAGCCAACCCGTCGGATTCTGACGACAGTATCGGCCGCAAGGCG   |
| D4 | 18[79]16[80]BLK   | GATGTGCTTCAGGAAGATCGCACAATGTGA                     |
| E4 | 15[96]17[95]BLK   | ATATTTTGGCTTTCATCAACATTATCCAGCCA                   |
| F4 | 18[111]16[112]BLK | TCTTCGCTGCACCGCTTCTGGTGCGGCCCTTCC                  |
| G4 | 15[128]18[128]BLK | TAAATCAAATAATTGCGCTCTCGGAAACCAGGCAAAGGGAAGG        |
| H4 | 15[160]16[144]BLK | ATCGCAAGTATGTAAATGCTGATGATAGGAAC                   |
| I4 | 18[143]17[159]BLK | CAACTGTTGCGCCATTGCGCATTCAAACATCA                   |
| J4 | 18[175]16[176]BLK | CTGAGCAAAAATTAATTACATTTTGGGTTA                     |
| K4 | 15[192]18[192]BLK | TCAAATATAACCTCCGGCTTAGGTAACAATTTTCAATTTGAAGGCGAATT |
| L4 | 18[207]16[208]BLK | CGCGCAGATTACCTTTTTTAAATGGGAGAGACT                  |
| M4 | 15[224]17[223]BLK | CCTAAATCAAATCATAGGTCTAAACAGTA                      |
| N4 | 18[239]16[240]BLK | CCTGATTGCAATATATGTGAGTGATCAATAGT                   |
| O4 | 15[256]18[256]BLK | GTGATAAAAAGACGCTGAGAAGAGATAACCTTGCTTCTGTTCCGGGAGA  |
| P4 | 18[271]16[272]BLK | CTTTTACAAAATCGTCGCTATTAGCGATAG                     |
| A5 | 13[32]15[31]BLK   | AACGCAAAATCGATGAACGGTACCGGTTGA                     |
| B5 | 16[47]14[48]BLK   | ACAAACGGAAAAGCCCCAAAACACTGGAGCA                    |
| C5 | 13[64]15[63]BLK   | TATATTTTGCATTGCCTGAGAGTGGAAGATT                    |
| D5 | 16[79]14[80]BLK   | GCGAGTAAAAATATTTAAATTGTTACAAAG                     |
| E5 | 13[96]15[95]BLK   | TAGGTAAACTATTTTTGAGAGATCAAACGTTA                   |
| F5 | 16[111]14[112]BLK | TGTAGCCATTAATAATTCGCATTAATGCCGGA                   |
| G5 | 13[128]15[127]BLK | GAGACAGCTAGCTGATAAATTAATTTTTGT                     |
| H5 | 13[160]14[144]BLK | GTAATAAGTTAGGCAGAGGCATTTATGATATT                   |
| I5 | 16[143]15[159]BLK | GCCATCAAGCTCATTTTTTAACCACAAATCCA                   |
| J5 | 16[175]14[176]BLK | TATAACTAACAAAGAACGCGAGAACGCCAA                     |
| K5 | 13[192]15[191]BLK | GTAAAGTAATCGCCATATTTAACAAAACTTTT                   |
| L5 | 16[207]14[208]BLK | ACCTTTTTATTTTAGTTAATTTTATAGGGCTT                   |
| M5 | 13[224]15[223]BLK | ACAACATGCCAACGCTCAACAGTCTTCTGA                     |
| N5 | 16[239]14[240]BLK | GAATTTATTTAATGGTTTGAAATATTCTTACC                   |
| O5 | 13[256]15[255]BLK | GTTTATCAATATGCGTTATACAAACCGACCGT                   |
| P5 | 16[271]14[272]BLK | CTTAGATTTAAGGCGTTAATAAAGCCTGT                      |
| A6 | 11[32]13[31]BLK   | AACAGTTTTGTACAAAAACATTTTATTTTC                     |
| B6 | 14[47]12[48]BLK   | AACAAGAGGGATAAAAATTTTTAGCATAAAGC                   |

|    |                   |                                          |
|----|-------------------|------------------------------------------|
| C6 | 11[64]13[63]BLK   | GATTTAGTCAATAAAGCCTCAGAGAACCCTCA         |
| D6 | 14[79]12[80]BLK   | GCTATCAGAAATGCAATGCCTGAATTAGCA           |
| E6 | 11[96]13[95]BLK   | AATGGTCAACAGGCAAGGCAAAGAGTAATGTG         |
| F6 | 14[111]12[112]BLK | GAGGGTAGGATTCAAAAGGGTGAGACATCCAA         |
| G6 | 11[128]13[127]BLK | TTTGGGGATAGTAGTAGCATTAAAAGGCCG           |
| H6 | 11[160]12[144]BLK | CCAATAGCTCATCGTAGGAATCATGGCATCAA         |
| I6 | 14[143]13[159]BLK | CAACCGTTTCAAATCACCATCAATTCGAGCCA         |
| J6 | 14[175]12[176]BLK | CATGTAATAGAATATAAAGTACCAAGCCGT           |
| K6 | 11[192]13[191]BLK | TATCCGGTCTCATCGAGAACAAGCGACAAAAG         |
| L6 | 14[207]12[208]BLK | AATTGAGAATTCTGTCCAGACGACTAAACCAA         |
| M6 | 11[224]13[223]BLK | GCGAACCTCCAAGAACGGGTATGACAATAA           |
| N6 | 14[239]12[240]BLK | AGTATAAAGTTCAGCTAATGCAGATGTCTTTC         |
| O6 | 11[256]13[255]BLK | GCCTTAAACCAATCAATAATCGGCACGCGCCT         |
| P6 | 14[271]12[272]BLK | TTAGTATCACAATAGATAAGTCCACGAGCA           |
| A7 | 9[32]11[31]BLK    | TTTACCCCAACATGTTTTAAATTTCCATAT           |
| B7 | 12[47]10[48]BLK   | TAAATCGGGATTCCCAATTCTGCGATATAATG         |
| C7 | 9[64]11[63]BLK    | CGGATTGCAGAGCTTAATTGCTGAAACGAGTA         |
| D7 | 12[79]10[80]BLK   | AAATTAAGTTGACCATTAGATACTTTTTGCG          |
| E7 | 9[96]11[95]BLK    | CGAAAGACTTTGATAAGAGGTCATATTTGCA          |
| F7 | 12[111]10[112]BLK | TAAATCATATAACCTGTTTAGCTAACCTTTAA         |
| G7 | 9[128]11[127]BLK  | GCTTCAATCAGGATTAGAGAGTTATTTTCA           |
| H7 | 9[160]10[144]BLK  | AGAGAGAAAAAATGAAAATAGCAAGCAAAC           |
| I7 | 12[143]11[159]BLK | TTCTACTACGCGAGCTGAAAAGTTACCGCGC          |
| J7 | 12[175]10[176]BLK | TTTTATTTAAGCAAATCAGATATTTTTTGT           |
| K7 | 9[192]11[191]BLK  | TTAGACGGCCAAATAAGAAACGATAGAAGGCT         |
| L7 | 12[207]10[208]BLK | GTACCGCAATTCTAAGAACGCGAGTATTATTT         |
| M7 | 9[224]11[223]BLK  | AAAGTCACAAAATAAACAGCCAGCGTTTTA           |
| N7 | 12[239]10[240]BLK | CTTATCATTCCCGACTTGCGGGAGCCTAATTT         |
| O7 | 9[256]11[255]BLK  | GAGAGATAGAGCGTCTTTCCAGAGGTTTTGAA         |
| P7 | 12[271]10[272]BLK | TGTAGAAATCAAGATTAGTTGCTCTTACCA           |
| A8 | 7[32]9[31]BLK     | TTTAGGACAAATGCTTTAAACAATCAGGTC           |
| B8 | 10[47]8[48]BLK    | CTGTAGCTTGACTATTATAGTCAGTTCATTGA         |
| C8 | 7[56]9[63]BLK     | ATGCAGATACATAACGGGAATCGTCATAAATAAAGCAAAG |
| D8 | 10[79]8[80]BLK    | GATGGCTTATCAAAAAGATTAAGAGCGTCC           |
| E8 | 7[96]9[95]BLK     | TAAGAGCAAATGTTTAGACTGGATAGGAAGCC         |
| F8 | 10[111]8[112]BLK  | TTGCTCCTTTCAAATATCGCGTTTGAGGGGGT         |
| G8 | 7[120]9[127]BLK   | CGTTTACCAGACGACAAAGAAGTTTTGCCATAATTCGA   |
| H8 | 7[160]8[144]BLK   | TTATTACGAAGAACTGGCATGATTGCGAGAGG         |

|     |                  |                                                  |
|-----|------------------|--------------------------------------------------|
| I8  | 10[143]9[159]BLK | CCAACAGGAGCGAACCAGACCGGAGCCTTTAC                 |
| J8  | 10[175]8[176]BLK | TTAACGTCTAACATAAAAAACAGGTAACGGA                  |
| K8  | 7[184]9[191]BLK  | CGTAGAAAATACATACCGAGGAAACGCAATAAGAAGCGCA         |
| L8  | 10[207]8[208]BLK | ATCCCAATGAGAATTAECTGAACAGTTACCAG                 |
| M8  | 7[224]9[223]BLK  | AACGCAAAGATAGCCGAACAAACCCTGAAC                   |
| N8  | 10[239]8[240]BLK | GCCAGTTAGAGGGTAATTGAGCGCTTTAAGAA                 |
| O8  | 7[248]9[255]BLK  | GTTTATTTTGTCAATCTTACCGAAGCCCTTTAATATCA           |
| P8  | 10[271]8[272]BLK | ACGCTAACACCCACAAGAATTGAAAATAGC                   |
| A9  | 5[32]7[31]BLK    | CATCAAGTAAAACGAACTAACGAGTTGAGA                   |
| B9  | 8[47]6[48]BLK    | ATCCCCCTATACCACATTCAACTAGAAAAATC                 |
| D9  | 8[79]6[80]BLK    | AATACTGCCCAAAGGAATTACGTGGCTCA                    |
| E9  | 5[96]7[95]BLK    | TCATTCAGATGCGATTTTAAGAACAGGCATAG                 |
| F9  | 8[111]6[112]BLK  | AATAGTAAACACTATCATAACCCTCATTGTGA                 |
| H9  | 5[160]6[144]BLK  | GCAAGGCCTCACCAGTAGCACCATGGGCTTGA                 |
| I9  | 8[143]7[159]BLK  | CTTTTGCAGATAAAAACCAAATAAAGACTCC                  |
| J9  | 8[175]6[176]BLK  | ATACCCAACAGTATGTTAGCAAATTAGAGC                   |
| L9  | 8[207]6[208]BLK  | AAGGAAACATAAAGGTGGCAACATTATCACCG                 |
| M9  | 5[224]7[223]BLK  | TCAAGTTTCATTAAGGTGAATATAAAAAGA                   |
| N9  | 8[239]6[240]BLK  | AAGTAAGCAGACACCACGGAATAATATTGACG                 |
| P9  | 8[271]6[272]BLK  | AATAGCTATCAATAGAAAATTCAACATTCA                   |
| A10 | 3[32]5[31]BLK    | AATACGTTTGAAAGAGGACAGACTGACCTT                   |
| B10 | 6[47]4[48]BLK    | TACGTTAAAGTAATCTTGACAAGAACCGAACT                 |
| D10 | 6[79]4[80]BLK    | TTATACCACCAAATCAACGTAACGAACGAG                   |
| E10 | 3[96]5[95]BLK    | ACACTCATCCATGTTACTTAGCCGAAAGCTGC                 |
| F10 | 6[111]4[112]BLK  | ATTACCTTTGAATAAGGCTTGCCCAAATCCGC                 |
| H10 | 3[160]4[144]BLK  | TTGACAGGCCACCACCAGAGCCGCGATTTGTA                 |
| I10 | 6[143]5[159]BLK  | GATGGTTTGAACGAGTAGTAAATTTACCATTA                 |
| J10 | 6[175]4[176]BLK  | CAGCAAAAAGGAAACGTCACCAATGAGCCGC                  |
| L10 | 6[207]4[208]BLK  | TCACCGACGCACCGTAATCAGTAGCAGAACCG                 |
| M10 | 3[224]5[223]BLK  | TTAAAGCCAGAGCCGCCACCCTCGACAGAA                   |
| N10 | 6[239]4[240]BLK  | GAAATTATTGCCTTTAGCGTCAGACCGGAACC                 |
| P10 | 6[271]4[272]BLK  | ACCGATTGTCGGCATTTCGGTCATAATCA                    |
| A11 | 1[32]3[31]BLK    | AGGCTCCAGAGGCTTTGAGGACACGGGTAA                   |
| B11 | 4[47]2[48]BLK    | GACCAACTAATGCCACTACGAAGGGGGTAGCA                 |
| C11 | 1[64]4[64]BLK    | TTTATCAGGACAGCATCGGAACGACACCAACCTAAAACGAGGTCAATC |
| D11 | 4[79]2[80]BLK    | GCGCAGACAAGAGGCAAAAAGAATCCCTCAG                  |
| E11 | 1[96]3[95]BLK    | AAACAGCTTTTTGCGGGATCGTCAACACTAAA                 |
| F11 | 4[111]2[112]BLK  | GACCTGCTCTTTGACCCCCAGCGAGGGAGTTA                 |

|     |                 |                                                  |
|-----|-----------------|--------------------------------------------------|
| G11 | 1[128]4[128]BLK | TGACAACTCGCTGAGGCTTGCATTATACCAAGCGCGATGATAAA     |
| H11 | 1[160]2[144]BLK | TTAGGATTGGCTGAGACTCCTCAATAACCGAT                 |
| I11 | 4[143]3[159]BLK | TCATCGCCAACAAAGTACAACGGACGCCAGCA                 |
| J11 | 4[175]2[176]BLK | CACCAGAAAGGTTGAGGCAGGTCATGAAAG                   |
| K11 | 1[192]4[192]BLK | GCGGATAACCTATTATTCTGAAACAGACGATTGGCCTTGAAGAGCCAC |
| L11 | 4[207]2[208]BLK | CCACCCTCTATTACAAAACAAATACCTGCCTA                 |
| M11 | 1[224]3[223]BLK | GTATAGCAAACAGTTAATGCCCAATCCTCA                   |
| N11 | 4[239]2[240]BLK | GCCTCCCTCAGAATGAAAAGCGCAGTAACAGT                 |
| O11 | 1[256]4[256]BLK | CAGGAGGTGGGGTCAGTGCCTTGAGTCTCTGAATTTACCGGGAACCAG |
| P11 | 4[271]2[272]BLK | AAATCACCTTCCAGTAAGCGTCAGTAATAA                   |
| A12 | 0[47]1[31]BLK   | AGAAAGGAACAACCTAAAGGAATTCAAAAAAA                 |
| B12 | 2[47]0[48]BLK   | ACGGCTACAAAAGGAGCCTTTAATGTGAGAAT                 |
| C12 | 0[79]1[63]BLK   | ACAACCTTCAACAGTTTCAGCGGATGTATCGG                 |
| D12 | 2[79]0[80]BLK   | CAGCGAAACTTGCTTTTCGAGGTGTTGCTAA                  |
| E12 | 0[111]1[95]BLK  | TAAATGAATTTTCTGTATGGGATTAATTTCTT                 |
| F12 | 2[111]0[112]BLK | AAGGCCGCTGATACCGATAGTTGCGACGTTAG                 |
| G12 | 0[143]1[127]BLK | TCTAAAGTTTTGTCGTCTTTCCAGCCGACAA                  |
| H12 | 0[175]0[144]BLK | TCCACAGACAGCCCTCATAGTTAGCGTAACGA                 |
| I12 | 2[143]1[159]BLK | ATATTCGGAACCATCGCCACGCAGAGAAGGA                  |
| J12 | 2[175]0[176]BLK | TATTAAGAAGCGGGGTTTTGCTCGTAGCAT                   |
| K12 | 0[207]1[191]BLK | TCACCAGTACAACTACAACGCCTAGTACCAG                  |
| L12 | 2[207]0[208]BLK | TTTCGGAAGTGCCGTCGAGAGGGTGAGTTTCG                 |
| M12 | 0[239]1[223]BLK | AGGAACCCATGTACCGTAACACTTGATATAA                  |
| N12 | 2[239]0[240]BLK | GCCCGTATCCGGAATAGGTGTATCAGCCCAAT                 |
| O12 | 0[271]1[255]BLK | CCACCCTCATTTTCAGGGATAGCAACCGTACT                 |
| P12 | 2[271]0[272]BLK | GTTTTAACTTAGTACCGCCACCCAGAGCCA                   |

**Supplementary Table 2 | List of biotinylated staples**

| No | Pos | Name                 | Sequence                                 | Mod   |
|----|-----|----------------------|------------------------------------------|-------|
| 1  | C02 | 18[63]20[56]BIOTIN   | ATTAAGTTTACCGAGCTCGAATTCGGGAAACCTGTCGTGC | 5'-BT |
| 2  | C09 | 4[63]6[56]BIOTIN     | ATAAGGGAACCGGATATTCATTACGTCAGGACGTTGGGAA | 5'-BT |
| 3  | G02 | 18[127]20[120]BIOTIN | GCGATCGGCAATTCACACAACAGGTGCCTAATGAGTG    | 5'-BT |
| 4  | G09 | 4[127]6[120]BIOTIN   | TTGTGTCGTGACGAGAAACACCAAATTTCAACTTTAAT   | 5'-BT |
| 5  | K02 | 18[191]20[184]BIOTIN | ATTCATTTTTGTTTGGATTATACTAAGAAACCACCAGAAG | 5'-BT |
| 6  | K09 | 4[191]6[184]BIOTIN   | CACCCTCAGAAACCATCGATAGCATTGAGCCATTTGGGAA | 5'-BT |

|   |     |                      |                                          |       |
|---|-----|----------------------|------------------------------------------|-------|
| 7 | O02 | 18[255]20[248]BIOTIN | AACAATAACGTAAAACAGAAATAAAAATCCTTTGCCCGAA | 5'-BT |
| 8 | O09 | 4[255]6[248]BIOTIN   | AGCCACCACTGTAGCGCGTTTTCAAGGGAGGGAAGGTAAA | 5'-BT |

### Supplementary Table 3 | Imaging parameters

| Figure                                  | Sample     | Origami dilution (after PEG purification) | Docking site sequence | Imager concentration (nM) | Imaging Buffer                        | Laser power before objective (mW)    | Exposure time (ms) | Frames | Binning |
|-----------------------------------------|------------|-------------------------------------------|-----------------------|---------------------------|---------------------------------------|--------------------------------------|--------------------|--------|---------|
| 1                                       | 20-nm-grid | 1:1                                       | P1 (9 nt)             | 4                         | B                                     | Gauss: 1.5<br>Flat-top: 2.4          | 200                | 200    | 16x16   |
| 2c,d,e<br>SI_Fig. 2                     | 20-nm-grid | 1:80                                      | P1 (9 nt)             | 4                         | B                                     | Gauss: 45<br>Flat-top: 77            | 200                | 5,000  | 2x2     |
| 2f,g<br>2h (9 nt)<br>SI_Fig. 3,4 (9 nt) | 20-nm grid | 1:80                                      | P1 (9 nt)             | 4                         | B                                     | Gauss: 45<br>Flat-top: 45            | 200                | 13,000 | 2x2     |
| 2h (8 nt)<br>SI_Fig. 3,4 (8 nt)         | 20-nm-grid | 1:80                                      | P1 (8 nt)             | 4                         | B                                     | Gauss: 45<br>Flat-top: 45            | 200                | 13,000 | 2x2     |
| 3a,b,c<br>SI_Fig. 5                     | 20-nm-grid | 1:80                                      | P1 (9 nt)             | 4                         | B                                     | Gauss: 45<br>Flat-top: 77            | 200                | 5,000  | 2x2     |
| 3d                                      | 10-nm-grid | 1:100                                     | P1 (9 nt)             | 0.5                       | 1× B<br>1× Trolox<br>1× PCA<br>1× PCD | Flat-top: 77                         | 200                | 25,000 | 2x2     |
| 3e,f<br>SI_Fig. 6                       | 20-nm-grid | 1:80                                      | P1 (9 nt)             | 20                        | B                                     | Gauss: 78<br>Flat-top: 132           | 200                | 10,000 | 2x2     |
| 4<br>SI_Fig. 8,9                        | COS-7      | -                                         | P1 (8 nt)             | 0.15                      | 1× C<br>1× Trolox<br>1× PCA<br>1× PCD | Gauss: 42<br>Flat-top: 25            | 150                | 60,000 | 2x2     |
| SI_Fig. 7                               | COS-7      | -                                         | P1 (9 nt)             | 0.2                       | 1× C<br>1× Trolox<br>1× PCA<br>1× PCD | Gauss: 90<br>Flat-top: 153           | 150                | 13,000 | 2x2     |
| SI_Fig. 11                              | 20-nm-grid | 1:80                                      | P1 (9 nt)             | 4                         | B                                     | Gauss: 45<br>Flat-top: 24,<br>45, 76 | 200                | 5,000  | 2x2     |

#### Supplementary Table 4 | Used DNA-PAINT sequences

| Shortname<br>(docking site length) | Docking sequence | Imager sequence | Experiment                       |
|------------------------------------|------------------|-----------------|----------------------------------|
| P1 (9 nt)                          | TT ATACATCTA     | CTAGATGTAT-Cy3b | All except the ones stated below |
| P1 (8 nt)                          | TT ATACATCT      | CTAGATGTAT-Cy3b | Fig. 2h<br>SI_Fig. 6             |
| P1 (10 nt)                         | TT ATACATCTAG    | AGATGTAT-Cy3b   | Fig. 4<br>SI_Fig. 8              |

#### Supplementary references

1. Schnitzbauer, J., Strauss, M. T., Schlichthaerle, T., Schueder, F. & Jungmann, R. Super-resolution microscopy with DNA-PAINT. *Nat. Protoc.* **12**, 1198 (2017).
